# Supplementary material
Source: Springer Nature journal article supplement (https://www.springermedizin.de/resource/supplementary/13690_2011_12_MOESM1_ESM.pdf/9422438)
Supplement: MOESM1 [file 9422438]

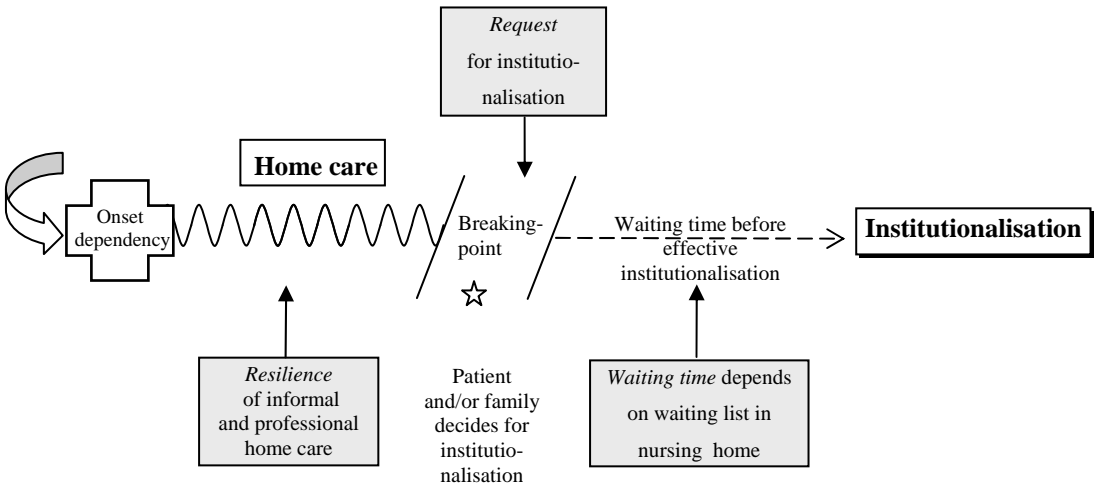

 = time span between the onset of dependency and the request for institutionalisation  
 = the point in time for the intake interview
